# Supplementary material for: Olive Oil and Nuts in Rheumatoid Arthritis Disease Activity
Source: MDPI journal article supplement (doi:10.3390/nu15040963), 2023-02-15
Supplement: s1 [file s1]

**Table S1.** Distribution of 365 rheumatoid arthritis patients according to selected characteristics. Italy 2018-2019.

| <b>Characteristics</b>                                              |                     |
|---------------------------------------------------------------------|---------------------|
| <b>Age at baseline</b> , years, median (IQR) <sup>1</sup>           | 58.46 (47.81-69.03) |
| ≤55 years, N (%)                                                    | 155 (42.47)         |
| >55, N (%)                                                          | 210 (57.53)         |
| <b>Female</b> , N (%)                                               | 287 (78.63)         |
| <b>Education</b> <sup>2</sup>                                       |                     |
| Primary school, N (%)                                               | 49 (13.42)          |
| Middle school, N (%)                                                | 79 (21.64)          |
| High school, N (%)                                                  | 134 (36.71)         |
| University, N (%)                                                   | 87 (23.84)          |
| <b>Body Mass Index</b> , Kg/m <sup>2</sup> , median (IQR)           | 23.63 (21.00-26.78) |
| <18.5, N (%)                                                        | 22 (6.03)           |
| 18.5 - 25, N (%)                                                    | 207 (56.71)         |
| 25 - 30, N (%)                                                      | 94 (25.75)          |
| ≥30, N (%)                                                          | 42 (11.51)          |
| <b>Cigarette smoking status</b> <sup>2</sup>                        |                     |
| Never, N (%)                                                        | 189 (51.78)         |
| Former, N (%)                                                       | 118 (32.33)         |
| Current, N (%)                                                      | 55 (15.07)          |
| <b>Alcohol drinking intensity</b>                                   |                     |
| Never, N (%)                                                        | 106 (29.04)         |
| <1 drink/day, N (%)                                                 | 194 (53.15)         |
| 1 - 2 drinks/day, N (%)                                             | 29 (7.95)           |
| ≥2 drinks/day, N (%)                                                | 36 (9.86)           |
| <b>Disease duration</b> , years, median (IQR)                       | 12.81 (8.08-20.72)  |
| ≤5, N (%)                                                           | 51 (13.97)          |
| 5 - 10, N (%)                                                       | 84 (23.01)          |
| 10 - 15, N (%)                                                      | 76 (20.82)          |
| 15 - 25, N (%)                                                      | 89 (24.38)          |
| >25, N (%)                                                          | 65 (17.81)          |
| Positivity for <b>rheumatoid factor</b> , N (%)                     | 196 (53.70)         |
| Positivity for <b>anti-citrullinated protein antibodies</b> , N (%) | 186 (50.96)         |
| <b>DAS28-CRP</b> , median (IQR)                                     | 2.21 (1.61-3.02)    |
| Remission, N (%)                                                    | 227 (62.19)         |
| Low activity, N (%)                                                 | 60 (16.44)          |
| Moderate activity, N (%)                                            | 64 (17.53)          |
| High activity, N (%)                                                | 14 (3.84)           |
| <b>SDAI</b> , median (IQR)                                          | 6.30 (3.01-11.81)   |
| Remission, N (%)                                                    | 108 (29.59)         |
| Low activity, N (%)                                                 | 155 (42.47)         |
| Moderate activity, N (%)                                            | 81 (22.19)          |

|                                                                          |                        |
|--------------------------------------------------------------------------|------------------------|
| High activity, N (%)                                                     | 21 (5.75)              |
| <b>Swollen joint count</b> (0-28), median (IQR)                          | 0 (0-1)                |
| <b>Tender joint count</b> (0-28), median (IQR)                           | 0 (0-2)                |
| <b>C-reactive protein</b> , mg / dL, median (IQR)                        | 2 (0.6-5.57)           |
| <b>General Health</b> (0-100), median (IQR)                              | 70 (60-85)             |
| <b>Physician's Global Assessment</b> (0-10), median (IQR)                | 2 (0-4)                |
| <b>Comorbidities</b>                                                     |                        |
| Chronic renal failure, N (%)                                             | 4 (1.1)                |
| Arterial hypertension, N (%)                                             | 122 (33.42)            |
| Coronary artery disease, N (%)                                           | 19 (5.21)              |
| Diabetes mellitus, N (%)                                                 | 19 (5.21)              |
| Gastro-esophageal reflux disease, N (%)                                  | 70 (19.18)             |
| Inflammatory bowel disease, N (%)                                        | 2 (0.55)               |
| Gastritis, N (%)                                                         | 32 (8.77)              |
| Esophagitis, N (%)                                                       | 5 (1.37)               |
| <b>Presence of any therapy</b>                                           |                        |
| No, N (%)                                                                | 30 (8)                 |
| Yes, N (%)                                                               | 335 (92)               |
| <b>Conventional Synthetic (cs)DMARDs<sup>3</sup></b>                     |                        |
| No, N (%)                                                                | 118 (34.2)             |
| Yes, N (%)                                                               | 247 (65.8)             |
| <b>Biologic (b)DMARDs<sup>3</sup></b>                                    |                        |
| No, N (%)                                                                | 187 (51.2)             |
| Yes, N (%)                                                               | 178 (48.8)             |
| <b>Targeted Synthetic (ts)DMARDs<sup>3</sup></b>                         |                        |
| No, N (%)                                                                | 358 (98.1)             |
| Yes, N (%)                                                               | 7 (1.9)                |
| <b>Steroids</b>                                                          |                        |
| No, N (%)                                                                | 209 (57.3)             |
| Yes, N (%)                                                               | 156 (42.7)             |
| <b>Total energy intake at baseline</b> , kcal, median (IQR) <sup>1</sup> | 1975.8 (1512.4-2454.2) |

<sup>1</sup> Age was calculated as the difference between date of interview and date of birth; <sup>2</sup>The sum does not add to the total because of a few missing values in education (16 subjects, 4.38%) and cigarette smoking status (3 subjects, 0.82%); <sup>3</sup> Disease Modifying Anti-Rheumatic Drugs.
